# Supplementary material for: Age-associated alterations in γδ T-cells are present predominantly in individuals infected with Cytomegalovirus
Source: PubMed Central journal article supplement (PMC3703274; doi:10.1186/1742-4933-10-26), 2013-07-03
Supplement: 1742-4933-10-26-S1.pdf [file 1742-4933-10-26-S1.pdf]

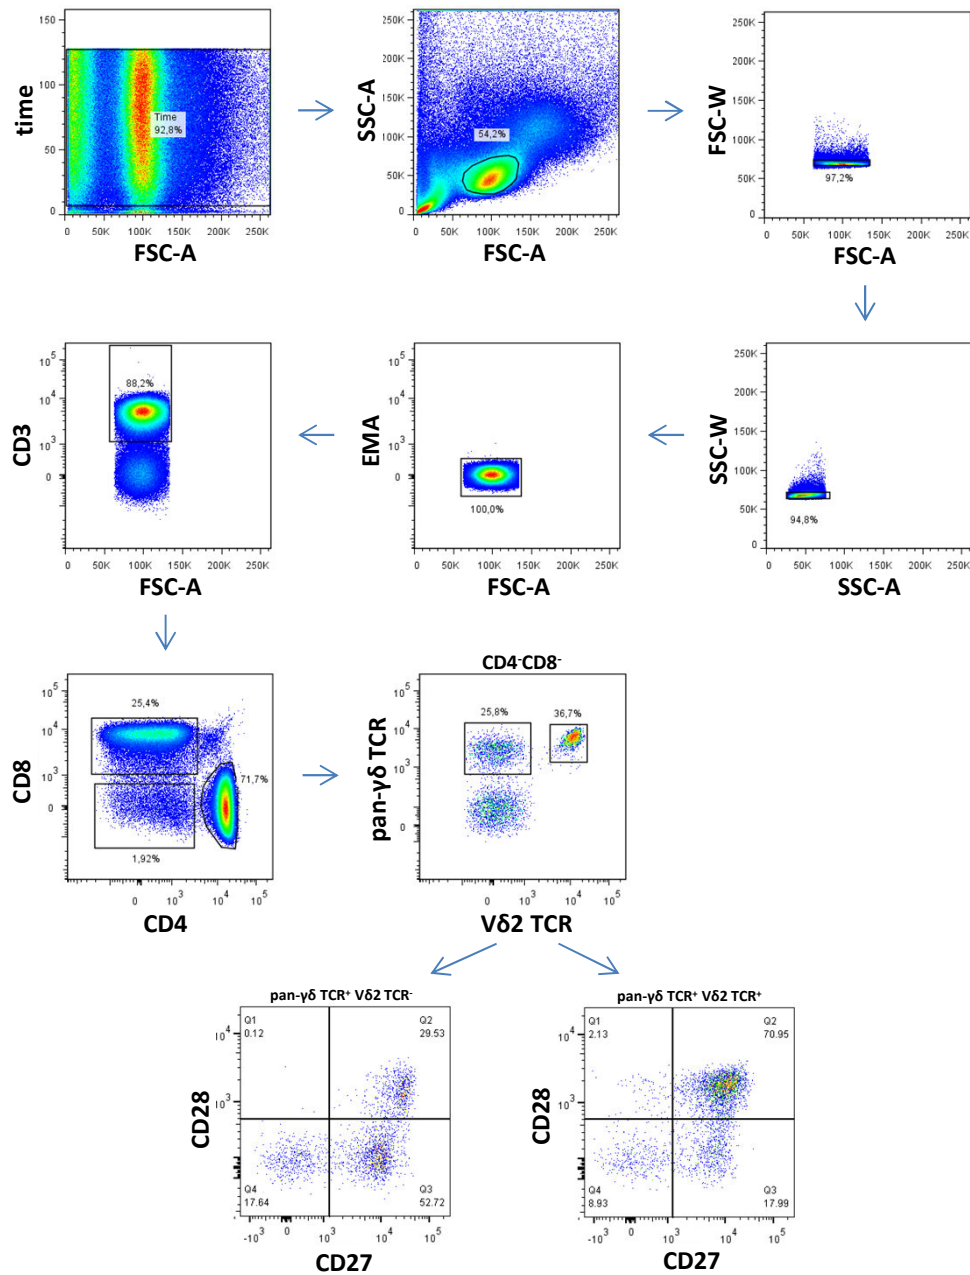

**Additional File 1. Gating-strategy for  $\gamma\delta$  T-cell frequency and differentiation phenotype.** After exclusion of events acquired during non-constant flow of the machine in a time vs FSC plot, the lymphocyte population was gated in a FSC vs SSC plot followed by exclusion of duplets in an FSC-height- vs. FSC-width plot. After exclusion of EMA<sup>+</sup> dead cells, CD4<sup>-</sup> CD8<sup>-</sup> cells were gated within the CD3<sup>+</sup> gate and used as starting populations to analyse  $\gamma\delta$  T-cells, which were characterised as  $\gamma\delta^+$  V $\delta 2^+$  or  $\gamma\delta^+$  V $\delta 2^-$ . The latter populations were further studied for CD27 and CD28 expression to determine their differentiation phenotype. This strategy was used for analysing all 33 samples.
